# Supplementary material for: Pharmacists’ Knowledge About the Impact of Augmented Renal Clearance on Antimicrobial Dosing in Critically Ill Patients: A Cross-Sectional Study
Source: PubMed Central journal article supplement — Infect Dis Ther. 2020 Jun 27;9(3):599–608. doi: 10.1007/s40121-020-00310-9 (PMC7452990; doi:10.1007/s40121-020-00310-9), 2020-06-27
Supplement: 40121_2020_310_MOESM1_ESM.pdf [file 40121_2020_310_MOESM1_ESM.pdf]

# **Pharmacists' knowledge about the impact of Augmented Renal Clearance on antimicrobial dosing in critically ill patients: a cross-sectional study**

Consent Version: 01/16/2020

Page 1 of 1

## **King Faisal University Consent to Participate in Research**

**Title of Project: Pharmacists' knowledge about the impact of Augmented Renal Clearance on antimicrobial dosing in critically ill patients: a cross-sectional study**

Principal Investigator: Abdulaziz Almulhim, Pharm.D.

You are being asked to participate in a research study. Your participation in this research study is voluntary and you do not have to participate. This document contains important information about this study and what to expect if you decide to participate.

The purpose of this study is to assess pharmacists' knowledge in scope of antibiotic dosing in critically ill patients with augmented renal clearance. Your participation in this on-line survey will help the scientific and clinical communities better understand knowledge gaps and needs for education. We estimate that it will take a maximum of 3 minutes of your time to complete the questionnaire.

Risks to participants are considered minimal. There will be no costs for participating, nor will you benefit directly from participating.

The information that you give will be anonymous. We have taken all reasonable measures to protect your identity and responses. The questions in this survey do not ask you to reveal any personal identifying information such as your name, the data are encrypted and stored in a password-protected database, and IP addresses are not collected.

For questions, concerns, or complaints about the study, you may contact Abdulaziz Almulhim by email, [asaalmulhim@kfu.edu.sa](mailto:asaalmulhim@kfu.edu.sa), or telephone at +966535658885

[This questionnaire is intended for licensed pharmacists only.](#)

Completing the survey will indicate your willingness to participate in the survey and

consent for your responses to be used for research.

[Continue to Survey](#)
